# Supplementary material for: EphrinB2 knockdown in cervical spinal cord preserves diaphragm innervation in a mutant SOD1 mouse model of ALS
Source: eLife. 2024 Jan 15;12:RP89298. doi: 10.7554/eLife.89298 (PMC10945582; doi:10.7554/eLife.89298)
Supplement: Figure 1—source data 1. [file elife-89298-fig1-data1.xlsx]

## Sheet: Sheet1
Source Data for Figure 1
Figure 1, Panel E
WT	SOD1 60d	SOD1 120d	SOD1 End
0.238289	1.75829	2.78132	85.3254
1.1055	27.6974	114.649	53.9691
2.08652	26.2728	1.07687	50.9732
0.569691	18.5762	48.8177	63.4225
1		41.8311
