# Supplementary material for: EphrinB2 knockdown in cervical spinal cord preserves diaphragm innervation in a mutant SOD1 mouse model of ALS
Source: eLife. 2024 Jan 15;12:RP89298. doi: 10.7554/eLife.89298 (PMC10945582; doi:10.7554/eLife.89298)
Supplement: Figure 2—source data 1. [file elife-89298-fig2-data1.xlsx]

## Sheet: Sheet1
Source Data for Figure 2
Figure 2, Panel M				Figure 2, Panel N
NeuN	Olig2	GFAP		Control	shRNA-EphrinB2
5.52	0.53	53.28		115	14
1.75	0	66.89		103	16
3.54	0	49.42		42.75	20
3.60333	0.176667	56.53		86.9167	16.6667
