# Supplementary material for: EphrinB2 knockdown in cervical spinal cord preserves diaphragm innervation in a mutant SOD1 mouse model of ALS
Source: eLife. 2024 Jan 15;12:RP89298. doi: 10.7554/eLife.89298 (PMC10945582; doi:10.7554/eLife.89298)
Supplement: Figure 3—source data 1. [file elife-89298-fig3-data1.xlsx]

## Sheet: Sheet1
Source Data for Figure 3
Figure 3, Panel B			Figure 3, Panel G
Control	shRNA-EphrinB2		Control	shRNA-EphrinB2
237.305	355.735		2.515	4.925
258.637	333.974		3.26	3.385
303.363	343.22		2.49	4.105
266.435	344.309		2.005	4.4
			2.5675	4.20375
