# Supplementary material for: EphrinB2 knockdown in cervical spinal cord preserves diaphragm innervation in a mutant SOD1 mouse model of ALS
Source: eLife. 2024 Jan 15;12:RP89298. doi: 10.7554/eLife.89298 (PMC10945582; doi:10.7554/eLife.89298)
Supplement: Figure 4—source data 1. [file elife-89298-fig4-data1.xlsx]

## Sheet: Sheet1
Source Data for Figure 4
Figure 4, Panel A
11 wks	11.5	12	12.5	13	13.5	14	14.5	15	15.5	16	16.5	17	17.5	18	18.5	19	19.5	20	20.5	21	21.5		11 wks	11.5	12	12.5	13	13.5	14	14.5	15	15.5	16	16.5	17	17.5	18	18.5	19	19.5	20	20.5	21	21.5
Control	Control	Control	Control	Control	Control	Control	Control	Control	Control	Control	Control	Control	Control	Control	Control	Control	Control	Control	Control	Control	Control		EphrinB2	EphrinB2	EphrinB2	EphrinB2	EphrinB2	EphrinB2	EphrinB2	EphrinB2	EphrinB2	EphrinB2	EphrinB2	EphrinB2	EphrinB2	EphrinB2	EphrinB2	EphrinB2	EphrinB2	EphrinB2	EphrinB2	EphrinB2	EphrinB2	EphrinB2
22.8	23	24.6	23.8	24.1	24.3	24.6	25.4	25.7	25.5	26	26	26.1	25.5	25.5	25.6	24.9	24.5	24.3	23.7	22.9	20.8		23.6	25.9	24.1	24.1	26	25.2	25.6	25.9	25	25.5	25.5	25.6	25.1	24.9	24.3	24.2	22.9	21.7	21.1	21
23.9	24.6	26.8	26.8	26.6	27	27.2	27.3	27.4	27.5	27	27.5	27.5	27.6	27.5	28.4	27.2	26.8	24.1	24.3				26.6	22.4	25.3	27	27.6	27.5	27.2	28.4	28	28	28.6	28.9
26.1	23.7	28.1	27.9	27.9	28.7	28.8	28.8	28.4	28.3	27.8	27.8	27.7	26.5	25.4	25.3	23.2							24.8	23.6	24	24.1	25.1	25.4	25.7	27.5	25.7	27.6	27.1	27.9	25.4	26.9	28.3	27.8	28.1	26.7	26.6	26.5	26.3	25.3
23.1	23.3	24.5	24.3	24.5	24.5	24.4	24.5	24.9	24.5	24.2	24.4	24.2	24.3	23.4	24.5	23.1	22.8	22.4	22.6	21.9	21.1		20.6	20.5	21	20.5	20.9	21.2	21.8	22.6	23	23.1	24.5	25.2	25.1	24.2	23.9	24.1	23.2	22.1	21.9	19.6
23	23	23.9	24.2	24.3	24.1	24.1	24.6	24.2	24.1	23.9	24.2	23.7	22.7	20.8	20.5								26.3	25.8	25.1	25.3	26	26.7	26.9	28.5	27.2	27	27.6	28.1
24	25.1	25.9	25.5	26.1	27	26.7	26.7	26.1	26.5	26.2	27	26.3	25.8	25.8	25.3	22.2	20.9	20.2					24	24.1	26.1	26.2	26	26.9	26.8	26.8	26.5	26.7	26.7	27.4	26.7	26.3	26.2	26.1	26	24.9	24.7	24.5	23.9	23.3
25.1	26	27.1	26.5	27.4	27.1	27.5	26.7	25.2	26.3	25.4	27.5	26.4	26.6	27.2	26.8	26.3	25.3	24.2	23.9				24.5	25.1	26.3	26.7	26.7	25.9	27.5	28.8	27.3	28.1	27.8	29.1	27.7	28.1	27.6	26.5	26.4	25.1	24.6	24.5	22.4	18.7
26.2	25.5	27.2	25.8	26.3	25.5	26.3	26.9	27.1	27.7	27.6	28.8	27.2	27	27.4	26.5	25.7	24.5						23.7	24.7	25.5	25	25	25.4	25.5	25.7	25.4	25.4	25.7	25.4	24.3	23.3	21.1
24	23.2	24.7	24.7	25.6	26.9	27.5	27.6	23.9	25.9	26.6	26.6	26.7	25.7	26.5	24.8	26	24.8	24.5	25.3	24.2			24.9	25.3	26.3	25.6	26.5	27.1	27.3	27.2	25.9	26.1	26	26.2	24.4	24.7	24.3	25
19.6	19.2	20.1	19.9	20.2	20.8	21.7	22.2	20.4	21.8	21.4	21.4	21.3	20.4	19.7	18.3								23.2	23.9	25.2	24.9	25.4	25.9	25.8	26.2	26.3	26.4	26.5	26.5	27.2	26.3	27	25.4	24.3	23.1	23	22.4	24.5
23.78	23.66	25.29	24.94	25.3	25.59	25.88	26.07	25.33	25.81	25.61	26.12	25.71	25.21	24.92	24.6	24.825	24.2286	23.2833	23.96	23	20.95		24.22	24.13	24.89	24.94	25.52	25.72	26.01	26.76	26.03	26.39	26.6	27.03	25.7375	25.5875	25.3375	25.5857	25.15	23.9333	23.65	23.0833	24.275	22.4333
Figure 4, Panel B
Control	EphrinB2
115	108
115	115
115	122
122	122
122	122
125	125
129	125
129	125
136	132
136	139
124.4	123.5
Figure 4, Panel C
11 wks	11.5	12	12.5	13	13.5	14	14.5	15	15.5	16	16.5	17	17.5	18	18.5	19	19.5	20	20.5	21	21.5		11 wks	11.5	12	12.5	13	13.5	14	14.5	15	15.5	16	16.5	17	17.5	18	18.5	19	19.5	20	20.5	21	21.5	22
Control	Control	Control	Control	Control	Control	Control	Control	Control	Control	Control	Control	Control	Control	Control	Control	Control	Control	Control	Control	Control	Control		EphrinB2	EphrinB2	EphrinB2	EphrinB2	EphrinB2	EphrinB2	EphrinB2	EphrinB2	EphrinB2	EphrinB2	EphrinB2	EphrinB2	EphrinB2	EphrinB2	EphrinB2	EphrinB2	EphrinB2	EphrinB2	EphrinB2	EphrinB2	EphrinB2	EphrinB2	EphrinB3
0.148	0.241	0.155	0.184	0.184	0.16	0.168	0.169	0.134	0.18	0.139	0.13	0.126	0.102	0.093	0.098	0.077	0.084	0.078	0	0	0		0.21	0.228	0.229	0.266	0.231	0.267	0.246	0.21	0.133	0.218	0.177	0.173	0.155	0.117	0.085	0	0.057	0	0	0
0.185	0.259	0.256	0.295	0.274	0.278	0.255	0.294	0.144	0.25	0.238	0.196	0.246	0.202	0.223	0.2	0.142	0.074	0.074	0				0.172	0.137	0.16	0.19	0.274	0.238	0.205	0.24	0.114	0.187	0.183	0.135
0.202	0.216	0.242	0.234	0.197	0.241	0.252	0.219	0.115	0.182	0.122	0.105	0.102	0.083	0	0	0							0.181	0.194	0.229	0.222	0.25	0.253	0.264	0.231	0.125	0.203	0.229	0.224	0.177	0.183	0.182	0.145	0.118	0.094	0.099	0.097	0.101	0.065	0
0.153	0.128	0.213	0.129	0.094	0.136	0.104	0.101	0.072	0.09	0.113	0.091	0.076	0.068	0.074	0.07	0.062	0.05	0.054	0	0	0		0.169	0.142	0.234	0.231	0.204	0.156	0.211	0.103	0.099	0.117	0.157	0.199	0.236	0.129	0.117	0.103	0.082	0.044	0.05	0
0.167	0.144	0.212	0.199	0.226	0.232	0.193	0.2	0.11	0.189	0.164	0.104	0.115	0.099	0	0.055								0.169	0.149	0.248	0.194	0.251	0.253	0.287	0.261		0.245	0.19	0.191
0.185	0.241	0.253	0.253	0.296	0.233	0.237	0.246	0.151	0.197	0.19	0.188	0.149	0.132	0.117	0.087	0.082	0	0					0.15	0.158	0.19	0.15	0.15	0.206	0.19	0.186	0.093	0.185	0.187	0.192	0.109	0.117	0.095	0.1	0.072	0.054	0.055	0.077	0	0	0
0.166	0.1	0.142	0.12	0.112	0.093	0.086	0.062	0.052	0.053	0.055	0	0	0	0	0	0	0	0	0				0.145	0.129	0.097	0.111	0.136	0.099	0.075	0.062	0.07	0.062	0.05	0	0.052	0	0	0	0	0	0	0	0	0
0.19	0.236	0.28	0.227	0.231	0.226	0.16	0.109	0.076	0.151	0.134	0.188	0.178	0.146	0.113	0.104	0.061	0						0.191	0.222	0.221	0.267	0.248	0.199	0.211	0.184	0.114	0.12	0.17	0.136	0.106	0.062	0
0.148	0.107	0.122	0.095	0.102	0.091	0.083	0.085	0.057	0.074	0.089	0.064	0.065	0	0	0	0	0	0	0	0			0.161	0.202	0.177	0.201	0.216	0.212	0.189	0.185	0.095	0.104	0.105	0			0	0
0.158	0.101	0.122	0.099	0.124	0.12	0.122	0.143	0.084	0.088	0.104	0.083	0.063	0	0	0								0.157	0.219	0.256	0.228	0.228	0.219	0.264	0.244	0.11	0.219	0.228	0.237	0.181	0.177	0.188	0.144	0.105	0.076	0.052	0	0
0.1702	0.1773	0.1997	0.1835	0.184	0.181	0.166	0.1628	0.0995	0.1454	0.1348	0.1149	0.112	0.0832	0.062	0.0614	0.053	0.0297143	0.0343333	0	0	0		0.1705	0.178	0.2041	0.206	0.2188	0.2102	0.2142	0.1906	0.105889	0.166	0.1676	0.1487	0.145143	0.112143	0.083375	0.0702857	0.0723333	0.0446667	0.0426667	0.029	0.02525	0.0216667	0
Figure 4, Panel D
Control	EphrinB2
69	69
69	94
69	94
76	101
87	105
94	108
105	108
105	111
108	118
122	122
90.4	103
Figure 4, Panel E
11 wks	11.5	12	12.5	13	13.5	14	14.5	15	15.5	16	16.5	17	17.5	18	18.5	19	19.5	20	20.5	21	21.5		11 wks	11.5	12	12.5	13	13.5	14	14.5	15	15.5	16	16.5	17	17.5	18	18.5	19	19.5	20	20.5	21	21.5
Control	Control	Control	Control	Control	Control	Control	Control	Control	Control	Control	Control	Control	Control	Control	Control	Control	Control	Control	Control	Control	Control		EphrinB2	EphrinB2	EphrinB2	EphrinB2	EphrinB2	EphrinB2	EphrinB2	EphrinB2	EphrinB2	EphrinB2	EphrinB2	EphrinB2	EphrinB2	EphrinB2	EphrinB2	EphrinB2	EphrinB2	EphrinB2	EphrinB2	EphrinB2	EphrinB2	EphrinB2
0.225	0.169	0.151	0.152	0.188	0.228	0.244	0.251	0.181	0.244	0.269	0.305	0.255	0.199	0.223	0.194	0.115	0.086	0.078	0.069	0.047	0.045		0.215	0.2	0.232	0.247	0.225	0.247	0.252	0.198	0.227	0.293	0.173	0.244	0.151	0.206	0.231	0.203	0.113	0.101	0.086	0.077
0.253	0.249	0.248	0.272	0.184	0.244	0.291	0.282	0.256	0.293	0.297	0.296	0.352	0.313	0.315	0.267	0.229	0.157	0.108	0.051				0.235	0.24	0.255	0.183	0.252	0.227	0.176	0.206	0.181	0.295	0.216	0.217
0.256	0.198	0.232	0.269	0.245	0.274	0.392	0.301	0.232	0.302	0.317	0.301	0.25	0.232	0.17	0.124	0.076							0.201	0.147	0.143	0.105	0.106	0.134	0.15	0.13	0.186	0.107	0.168	0.166	0.15	0.152	0.14	0.147	0.133	0.115	0.135	0.142	0.147	0.088
0.232	0.13	0.193	0.25	0.114	0.15	0.222	0.212	0.196	0.259	0.227	0.203	0.202	0.153	0.17	0.162	0.146	0.117	0.112	0.085	0.076	0.06		0.192	0.215	0.232	0.249	0.124	0.255	0.28	0.203	0.209	0.228	0.283	0.365	0.311	0.31	0.325	0.297	0.274	0.106	0.118	0.032
0.222	0.137	0.134	0.267	0.154	0.231	0.289	0.301	0.199	0.301	0.287	0.228	0.304	0.224	0.216	0.142								0.281	0.169	0.161	0.134	0.139	0.197	0.231	0.114			0.2	0.201
0.209	0.161	0.26	0.232	0.254	0.295	0.275	0.279	0.301	0.297	0.35	0.307	0.318	0.291	0.256	0.308	0.11	0.07	0					0.164	0.168	0.236	0.199	0.188	0.195	0.154	0.14	0.144	0.234	0.227	0.203	0.187	0.133	0.157	0.155	0.145	0.127	0.127	0.108	0.072	0.085
0.185	0.176	0.106	0.158	0.11	0.118	0.086	0.095	0.094	0.125	0.143	0.106	0.094	0.116	0.142	0.11	0.09	0.089	0.083	0.048				0.181	0.162	0.127	0.127	0.132	0.17	0.162	0.142	0.119	0.176	0.142	0.142	0.146	0.133	0.122	0.112	0.111	0.116	0.095	0.08	0.059	0.074
0.197	0.236	0.297	0.275	0.207	0.219	0.276	0.249	0.193	0.287	0.334	0.273	0.253	0.208	0.223	0.214	0.137	0						0.211	0.249	0.151	0.248	0.221	0.195	0.231	0.249	0.159	0.194	0.206	0.14	0.103	0.074	0
0.206	0.222	0.133	0.244	0.159	0.156	0.181	0.2	0.152	0.188	0.188	0.127	0.155	0.116	0.151	0.121	0.114	0.098	0.104	0.07	0.057			0.197	0.176	0.143	0.153	0.26	0.272	0.265	0.195	0.234	0.325	0.26	0.261		0.088	0.074	0
0.282	0.162	0.166	0.265	0.216	0.151	0.23	0.165	0.155	0.254	0.183	0.199	0.212	0.107	0.104	0								0.238	0.245	0.224	0.248	0.218	0.272	0.281	0.29	0.262	0.313	0.309	0.322	0.274	0.31	0.327	0.268	0.239	0.23	0.154	0.128	0.081
0.2267	0.184	0.192	0.2384	0.1831	0.2066	0.2486	0.2335	0.1959	0.255	0.2595	0.2345	0.2395	0.1959	0.197	0.1642	0.127125	0.0881429	0.0808333	0.0646	0.06	0.0525		0.2115	0.1971	0.1904	0.1893	0.1865	0.2164	0.2182	0.1867	0.191222	0.240556	0.2184	0.2261	0.188857	0.17575	0.172	0.168857	0.169167	0.1325	0.119167	0.0945	0.08975	0.0823333
Figure 4, Panel F			Figure 4, Panel G			Figure 4, Panel H			Figure 4, Panel I			Figure 4, Panel J			Figure 4, Panel K
Control	EphrinB2		Control	EphrinB2		Control	EphrinB2		Control	EphrinB2		Control	EphrinB2		Control	EphrinB2
69	69		4	1		13	3		3	9		0	-49		121	108
73	73		5	8		16	16		7	9		3	-18		121	108
105	87		6	10		23	22		8	10		4	4		123	116
105	105		6	10		29	24		9	10		13	7		129	120
115	108		6	12		42	26		10	11		13	11		131	132
118	111		7	15		45	29		32	21		14	14		133	135
118	122		8	16		52	31		34	29		21	14		135	138
122	122		9	19		64	43		36	67		29	17		139	140
122	125		14	11.375		65	71		52	78		35	21		141	147
125	129		14			70	29.4444		60	27.1111		36	2.33333		150	151
107.2	105.1		7.9			41.9			25.1			16.8			132.3	129.5
