# Supplementary material for: EphrinB2 knockdown in cervical spinal cord preserves diaphragm innervation in a mutant SOD1 mouse model of ALS
Source: eLife. 2024 Jan 15;12:RP89298. doi: 10.7554/eLife.89298 (PMC10945582; doi:10.7554/eLife.89298)
Supplement: Figure 5—source data 1. [file elife-89298-fig5-data1.xlsx]

## Sheet: Sheet1
Source Data for Figure 5
Figure 5, Panel F			Figure 5, Panel G			Figure 5, Panel H
Control	shRNA-EphrinB2		Control	shRNA-EphrinB2		Control	shRNA-EphrinB2
27	37.2		24.8	15.5		43.5	39.3
22.7	56.6		20.2	4.1		42	31.3
31.3	66		19.9	4.5		40.9	18.2
27	53.2667		21.6333	8.03333		42.1333	29.6
