# Supplementary material for: EphrinB2 knockdown in cervical spinal cord preserves diaphragm innervation in a mutant SOD1 mouse model of ALS
Source: eLife. 2024 Jan 15;12:RP89298. doi: 10.7554/eLife.89298 (PMC10945582; doi:10.7554/eLife.89298)
Supplement: Figure 6—source data 1. [file elife-89298-fig6-data1.xlsx]

## Sheet: Sheet1
Source Data for Figure 6
EphrinB2 immunoblotting
Non-ALS spinal cord	ALS spinal cord	ALS cortex
5	38.3	2.9
2.9	11.3	2.7
3.4	3.7	3.2
3.76667	17.7667	2.93333
